# Supplementary material
Source: PubMed Central journal article supplement (PMC5148626)
Supplement: NIHMS833097-supplement-Supporting_Information.pdf [file NIHMS833097-supplement-Supporting_Information.pdf]

# 1,3-Dipolar Cycloaddition with Diazo Groups: Noncovalent Interactions Overwhelm Strain

Brian Gold,<sup>†,§</sup> Matthew R. Aronoff,<sup>†,§</sup> and Ronald T. Raines<sup>\*,†,‡</sup>

<sup>†</sup>Department of Chemistry and <sup>‡</sup>Department of Biochemistry, University of Wisconsin–Madison, Madison, Wisconsin, 53706, United States

<sup>§</sup>B.G. and M.R.A. contributed equally to this work.

\*E-mail: rtraines@wisc.edu

| Contents                                                              | Page    |
|-----------------------------------------------------------------------|---------|
| Materials                                                             | S2      |
| General Experimental                                                  | S2      |
| Kinetic Experiments                                                   | S2      |
| <b>Figure S1.</b> Sample <sup>1</sup> H NMR spectra                   | S3      |
| Synthetic Procedures                                                  | S4      |
| Computational Methods                                                 | S6      |
| <b>Figure S2.</b> Calculated activation and reaction free energies    | S7      |
| <b>Table S1.</b> Calculated activation parameters                     | S7      |
| <b>Figure S3.</b> Distortion/interaction analysis                     | S8      |
| <b>Figure S4.</b> Natural bond orbital analysis                       | S9      |
| <b>Figure S5.</b> Calculated energies and free energies of activation | S10     |
| <b>Figures S6–S9</b> NMR spectra                                      | S11–S13 |
| Cartesian Coordinates                                                 | S13     |
| References                                                            | S21     |

## Materials

Silica gel (40  $\mu\text{m}$ ) was from SiliCycle (Québec, Canada). All chemicals and solvents were from Sigma–Aldrich (St. Louis, MO) and were used without further purification.

## General Experimental

*Temperature.* All procedures were performed in air at ambient temperature ( $\sim 22$  °C) and pressure (1.0 atm) unless specified otherwise.

*Solvent removal.* The phrase “concentrated under reduced pressure” refers to the removal of solvents and other volatile materials using a rotary evaporator at water aspirator pressure ( $< 20$  torr) while maintaining the water-bath temperature below 40 °C. Residual solvent was removed from samples at high vacuum ( $< 0.1$  torr). The term “high vacuum” refers to vacuum achieved by mechanical belt-drive oil pump.

*Instrumentation.*  $^1\text{H}$  and  $^{13}\text{C}$  NMR spectra for all compounds were acquired on Bruker Spectrometers in the NMRFAM at the University of Wisconsin–Madison operating at operating at 400, 500, or 750 MHz for  $^1\text{H}$  and 126 or 189 MHz for  $^{13}\text{C}$ . Chemical shift data are reported in units of  $\delta$  (ppm) relative to residual solvent or TMS. Electrospray ionization (ESI) mass spectrometry was performed with a Waters LCT instrument at the Mass Spectrometry Facility in the Department of Chemistry at the University of Wisconsin–Madison.

## Kinetic Experiments

All kinetics experiments monitored with NMR spectroscopy were conducted in triplicate, and the rate constants are reported as an average of the three values.  $^1\text{H}$  NMR experiments were carried out, monitoring diazo compound consumptions under pseudo-first-order conditions (5:1 diazo/alkyne).

The disappearance of the diazo group signal (monitored with NMR or UV spectroscopy) is advantageous for determination of rate constants during ligations. For OND cycloadditions, the extrusion of furan in the retro-Diels–Alder step might be slower for reactions of diazo compounds relative to analogous azide reactions, as the pyrazoline product must undergo a proton transfer step to generate the aromatic tautomer. Monitoring diazo compound consumption avoids possible complications arising from a slower second step, allowing for direct comparison of cycloaddition rates of alkynes and ONDs. Still, based on calculated energies of activation, the 1,3-dipolar cycloaddition is the rate-determining step (Figure S2), and consumption of the diazo compound does report on the overall rate of the reactions.

*General procedure for OND and alkyne kinetic experiments.* Stock solutions of diazoacetamide (0.3 M) and OND or alkyne (0.06 M) were prepared in  $\text{CD}_3\text{OD}$ . Equal volumes of each solution were added to generate a solution of 0.15 M dipole and 0.03 M dipolarophile. The NMR tube was inverted once and inserted into a spectrometer. An 8-scan NMR spectrum was acquired every 45 s, and the integrations were used to calculate concentrations from the known initial concentrations. A pseudo-first-order rate constant ( $k'$ ) was determined from the slope of the plot

of  $\ln[\text{diazo compound}]$  versus time. A second-order rate constant ( $k$ ) was calculated from the value of  $k'$  and the initial concentration of dipolarophile with the equation:  $k = k'/[\text{dipolarophile}]$ .

*Procedure for ethyl 4,4,4-trifluorobutynoate kinetic experiments.* Diazoacetamide was dissolved in methanol to a concentration of 40 mM. In a clear 96-well plate, 50  $\mu\text{L}$  of the diazoacetamide stock solution was combined with 50  $\mu\text{L}$  of a stock solution of an ethyl 4,4,4-trifluorobutynoate (1 equiv) to produce a final concentration of 20 mM for the diazo compound. Absorbance was measured using an Infinite M1000 plate reader from Tecan (Männedorf, Switzerland), monitoring at 388 nm, which is a wavelength of maximal absorbance by diazoacetamide. Multiple readings were taken from each well (circle (filled)  $3 \times 3$ ) every 60 s at ambient temperature, followed by an orbital mixing of 10 s. All assays were performed in triplicate with similar results, and an average of these values was used for rate determinations. The formation of final products was confirmed by mass spectrometry and NMR spectroscopy from identical assays. A second-order rate constant ( $k$ ) was calculated as described above.

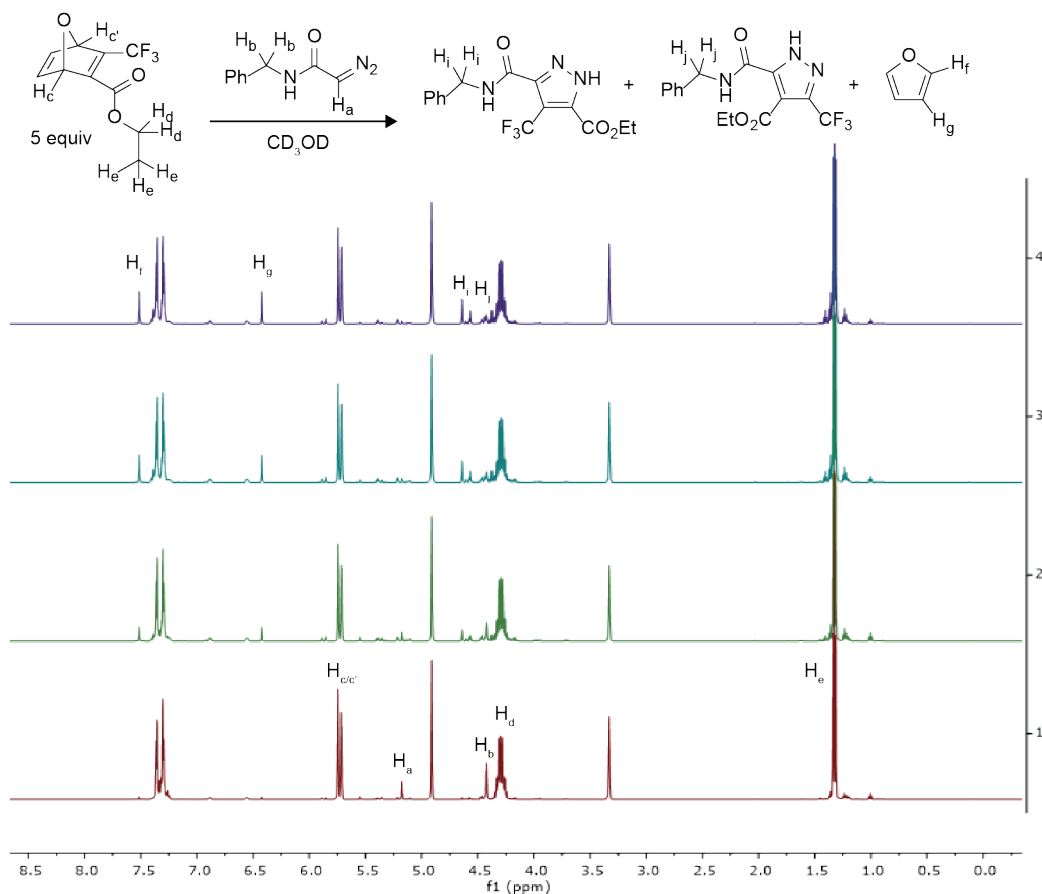

**Figure S1.** Sample  $^1\text{H}$  NMR spectra taken at various time points during the cycloaddition of diazoacetamide **1** (R = Bn) with OND **4a**.

## Synthetic Procedures

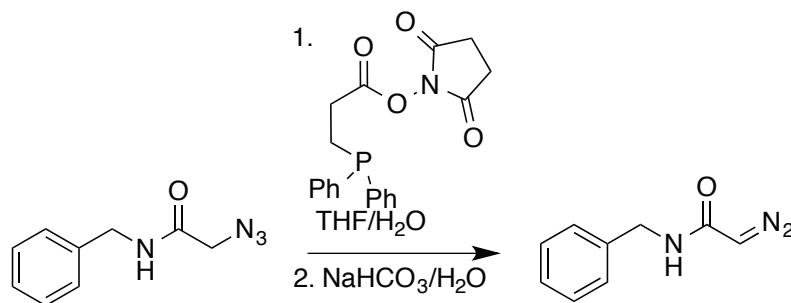

**N-Benzyl-2-diazoacetamide (1, R = Bn).** Diazoacetamide **1** (R = Bn) was synthesized as described previously.<sup>1</sup> Spectroscopic data were indistinguishable from those in the previous report.

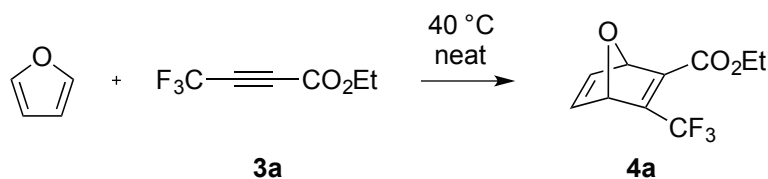

**Ethyl (1R,4S)-3-(trifluoromethyl)-7-oxabicyclo[2.2.1]hepta-2,5-diene-2-carboxylate (4a).** OND **4a** was synthesized as described previously.<sup>2</sup> Spectroscopic data were indistinguishable from those in the previous report.

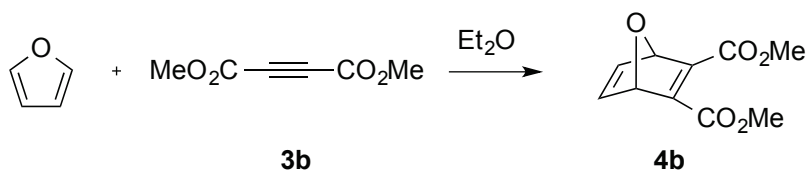

**Dimethyl (1R,4S)-7-oxabicyclo[2.2.1]hepta-2,5-diene-2,3-dicarboxylate (4b).** OND **4b** was synthesized as described previously.<sup>2</sup> Spectroscopic data were indistinguishable from those in the previous report.

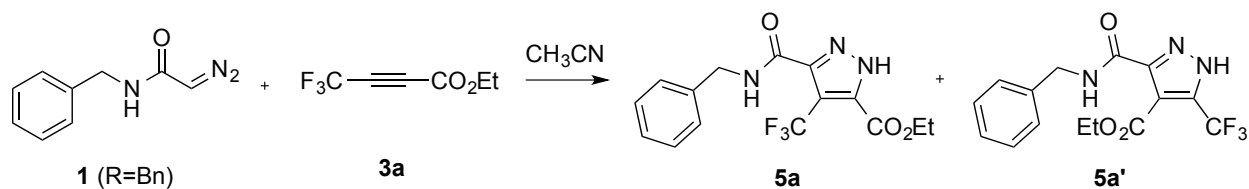

**Ethyl 3-(benzylcarbamoyl)-4-(trifluoromethyl)-1H-pyrazole-5-carboxylate (5a)** and **ethyl 5-(benzylcarbamoyl)-3-(trifluoromethyl)-1H-pyrazole-4-carboxylate (5a')**. Pyrazoles **5a** and

**5a'** were synthesized as described previously.<sup>3</sup> Spectroscopic data were indistinguishable from those in the previous report.

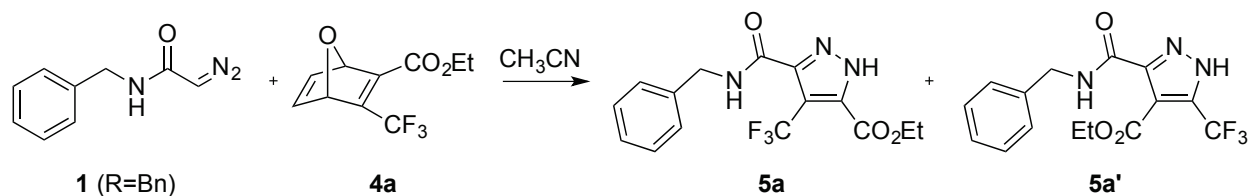

**Ethyl 3-(benzylcarbamoyl)-4-(trifluoromethyl)-1H-pyrazole-5-carboxylate (5a)** and **ethyl 5-(benzylcarbamoyl)-3-(trifluoromethyl)-1H-pyrazole-4-carboxylate (5a')**. *N*-Benzyl-2-diazoacetamide (2.7 mg, 0.015 mmol) was dissolved in CH<sub>3</sub>CN (0.25 mL). Ethyl (1*R*,4*S*)-3-(trifluoromethyl)-7-oxabicyclo[2.2.1]hepta-2,5-diene-2-carboxylate (12.9 mg, 0.055 mmol) was added, and the resulting solution was stirred overnight. The reaction mixture was concentrated to dryness, to provide a mixture of pyrazole **5a'** as the major product and pyrazole **5a** as the minor product. The regioisomeric ratio, as determined by integration of <sup>1</sup>H NMR spectra, was 0.75:1. Spectra were indistinguishable from those in the previous report.<sup>3</sup> <sup>1</sup>H NMR. **5a**: <sup>1</sup>H NMR (500 MHz, CDCl<sub>3</sub>, δ): 7.37–7.29 (m, 5H), 6.96 (s, 1H), 4.64 (d, *J* = 5.8 Hz, 2H), 4.45 (q, *J* = 7.1 Hz, 2H), 1.41 (t, *J* = 7.2 Hz, 3H). **5a'**: <sup>1</sup>H NMR (500 MHz, CDCl<sub>3</sub>, δ): 10.49 (s, 1H), 7.39–7.29 (m, 5H), 4.69 (d, *J* = 5.7 Hz, 2H), 4.39 (q, *J* = 7.2 Hz, 2H), 1.39 (t, *J* = 7.2 Hz, 3H).

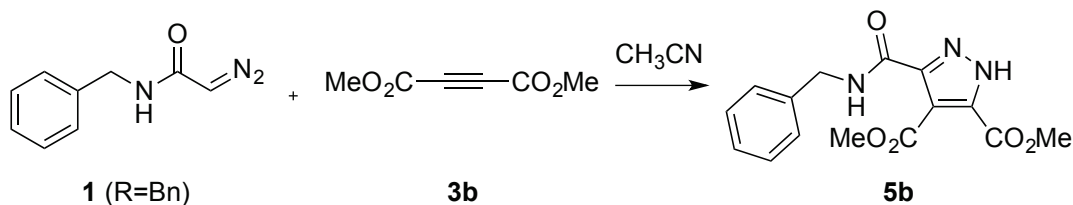

**Dimethyl 5-(benzylcarbamoyl)-1H-pyrazole-3,4-dicarboxylate (5b)**. *N*-Benzyl-2-diazoacetamide (8.5 mg, 0.05 mmol) was dissolved in CH<sub>3</sub>CN (0.25 mL). Dimethyl acetylenedicarboxylate (33.8 mg, 0.24 mmol) was added, and the resulting solution was stirred overnight. The reaction mixture was concentrated under reduced pressure to dryness, and the product was purified by column chromatography on silica gel (50% v/v EtOAc in hexanes) and concentrated under high vacuum to provide pyrazole **5b** as a colorless oil (14.7 mg, quant.). <sup>1</sup>H NMR (500 MHz, acetonitrile-*d*<sub>3</sub>, δ): 7.40–7.22 (m, 5H), 4.55 (d, *J* = 6.0 Hz, 2H), 3.88 (s, 3H), 3.82 (s, 3H). <sup>13</sup>C NMR (126 MHz, acetonitrile-*d*<sub>3</sub>, δ): 167.06, 141.30, 131.24, 130.17, 129.92, 55.21, 55.09, 45.39. HRMS (ESI) calcd. for C<sub>14</sub>H<sub>15</sub>N<sub>3</sub>O<sub>3</sub> [M+H]<sup>+</sup> 318.1085, found 318.1077.

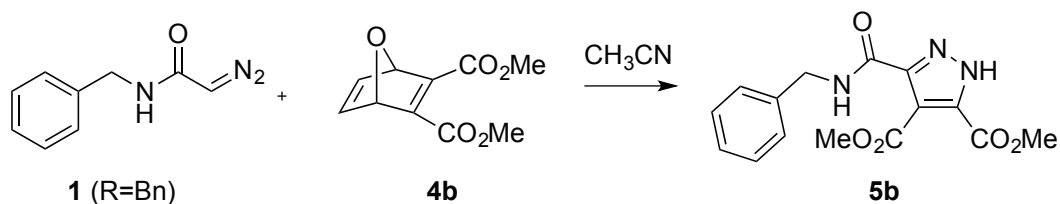

**Dimethyl 5-(benzylcarbamoyl)-1H-pyrazole-3,4-dicarboxylate (5b).** *N*-Benzyl-2-diazoacetamide (13.1 mg, 0.075 mmol) was dissolved in  $\text{CH}_3\text{CN}$  (0.25 mL). Diethyl (1*R*,4*S*)-7-oxabicyclo[2.2.1]hepta-2,5-diene-2,3-dicarboxylate (89.3 mg, 0.38 mmol) was added, and the resulting solution was stirred overnight. The reaction mixture was concentrated under high vacuum, and pyrazole **5b** was purified and identified as described above.

---

### Computational Methods

Optimizations were performed using Gaussian 09 software<sup>4</sup> at M06-2X level of theory<sup>5</sup> using the 6-31+G(2d,p) basis set. M06-2X has been shown to describe trends in reactivity accurately for other cycloadditions.<sup>6</sup> Solvation corrections were performed on gas-phase geometries using an IEFPCM dielectric continuum solvent model for methanol with UFF radii. This model does not explicitly include non-electrostatic contributions and should be considered as the first approximation of solvation effects.<sup>7</sup> Frequency calculations were performed to confirm each stationary point as minima or first-order saddle points. All  $\Delta E$  values include zero-point corrections. Remote substituents (Bn in **1** and Et in **3a** and **4a**) were modeled as methyl groups.

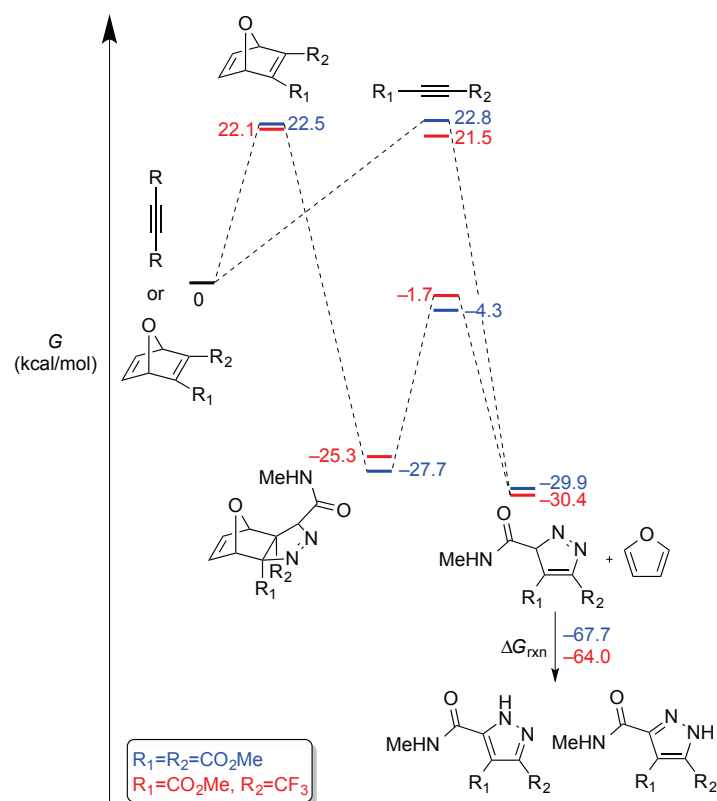

**Figure S2.** Calculated activation and reaction free energies for the cycloaddition of diazoacetamide **1** (R = Me) with alkynes or ONDs. Values were calculated at 298 K with the M06-2X/6-31+G(2d,p) level of theory. Energies (kcal/mol) include solvation corrections (MeOH) on gas-phase geometries with the IEFPCM model (radii = UFF).

**Table S1.** Calculated Activation Parameters for the Cycloaddition of Diazoacetamide **1** (R = Me) with Alkynes and ONDs<sup>a</sup>

| dipolarophile                      | R <sub>1</sub> | R <sub>2</sub>     | gas phase           |                     |                     |                     | MeOH                |                     |                     |                     |       |
|------------------------------------|----------------|--------------------|---------------------|---------------------|---------------------|---------------------|---------------------|---------------------|---------------------|---------------------|-------|
|                                    |                |                    | $\Delta E^\ddagger$ | $\Delta H^\ddagger$ | $\Delta G^\ddagger$ | $\Delta S^\ddagger$ | $\Delta E^\ddagger$ | $\Delta H^\ddagger$ | $\Delta G^\ddagger$ | $\Delta S^\ddagger$ |       |
| R <sup>1</sup> —C≡C—R <sup>2</sup> | <b>3a</b>      | CO <sub>2</sub> Et | CF <sub>3</sub>     | 8.6                 | 8.2                 | 22.6                | -48.5               | 9.6                 | 9.7                 | 21.5                | -39.6 |
|                                    | <b>3b</b>      | CO <sub>2</sub> Me | CO <sub>2</sub> Me  | 7.3                 | 6.8                 | 20.6                | -46.1               | 9.8                 | 9.4                 | 22.8                | -44.8 |
|                                    | <b>4a</b>      | CO <sub>2</sub> Et | CF <sub>3</sub>     | 6.1                 | 5.6                 | 20.3                | -49.5               | 8.2                 | 7.7                 | 22.1                | -48.3 |
|                                    | <b>4b</b>      | CO <sub>2</sub> Me | CO <sub>2</sub> Me  | 4.8                 | 4.3                 | 19.1                | -49.7               | 7.8                 | 7.2                 | 22.5                | -51.4 |

<sup>a</sup>Calculations were performed at the M06-2X/6-31+G(2d,p) level of theory. Energies are in kcal/mol or cal/mol·K. Solvation corrections were performed on gas-phase geometries with the IEFPCM model (radii = UFF).

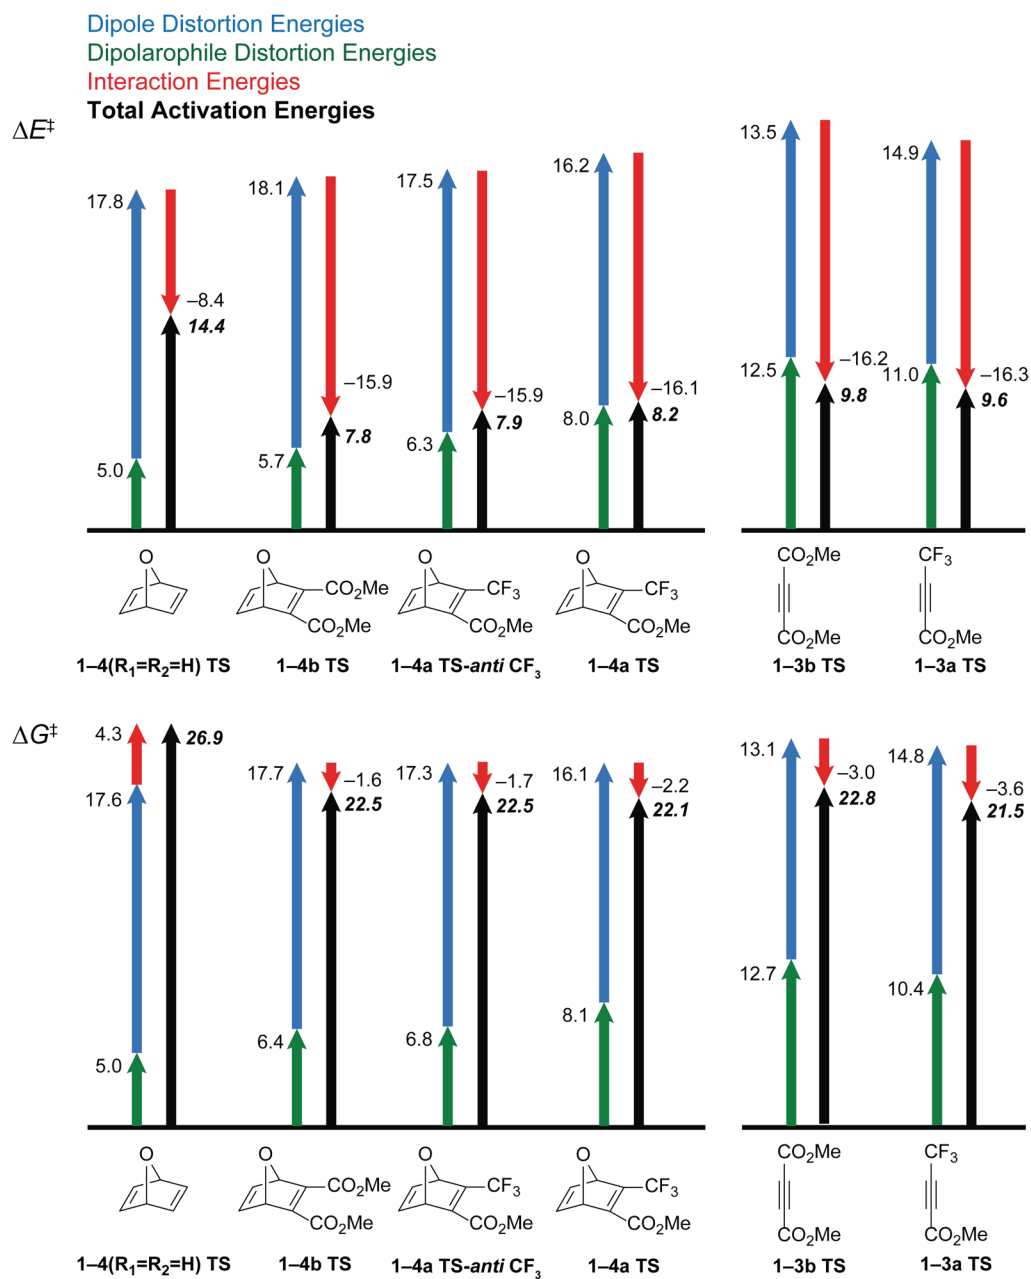

**Figure S3.** Distortion/interaction analysis for the cycloaddition of diazoacetamide **1** (R = Me) with OND and alkyne calculated at the M06-2X/6-31+G(2d,p) level of theory. Energies (kcal/mol) include solvation corrections (MeOH) on gas-phase geometries using IEFPCM model (radii = UFF).



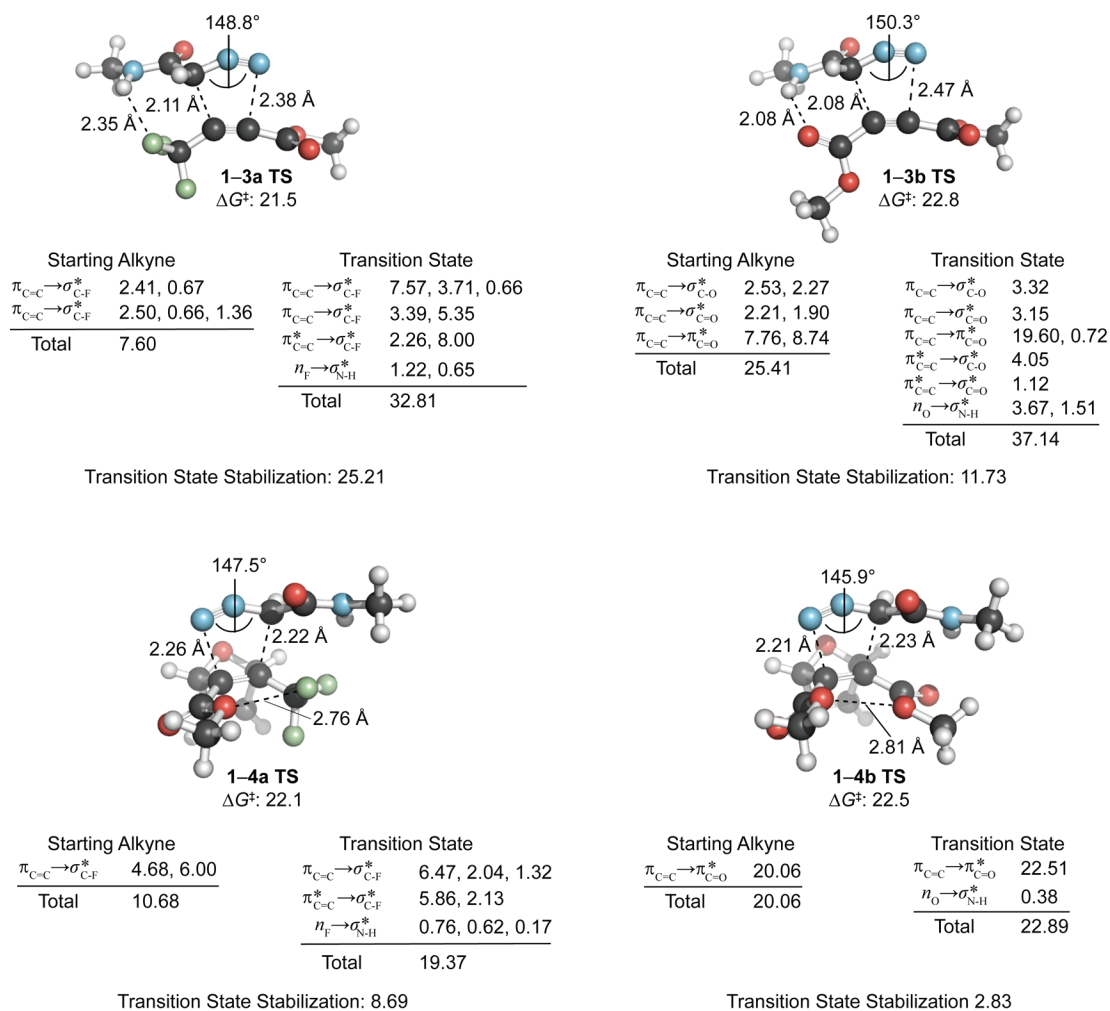

**Figure S4.** Natural bond orbital analysis for the cycloaddition of diazoacetamide **1** (R = Me) with alkynes and ONDs calculated at the M06-2X/6-31+G(2d,p) level of theory. Energies (kcal/mol) include solvation corrections (MeOH) on gas-phase geometries with the IEFPCM model (radii = UFF).

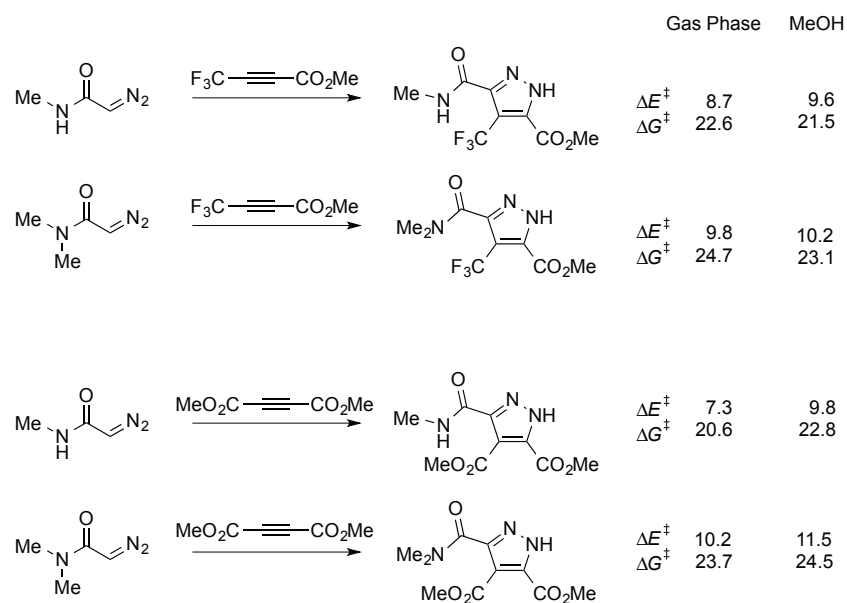

**Figure S5.** Calculated energies and free energies of activation (kcal/mol) for the cycloaddition of diazoacetamide **1** (R = Me) and its *N,N*-dimethyl analogue with alkynes **3a** and **3b** at the M06-2X/6-31+G(2d,p) level of theory. Solvation corrections (MeOH) were performed on gas-phase geometries with the IEFPCM model (radii = UFF).

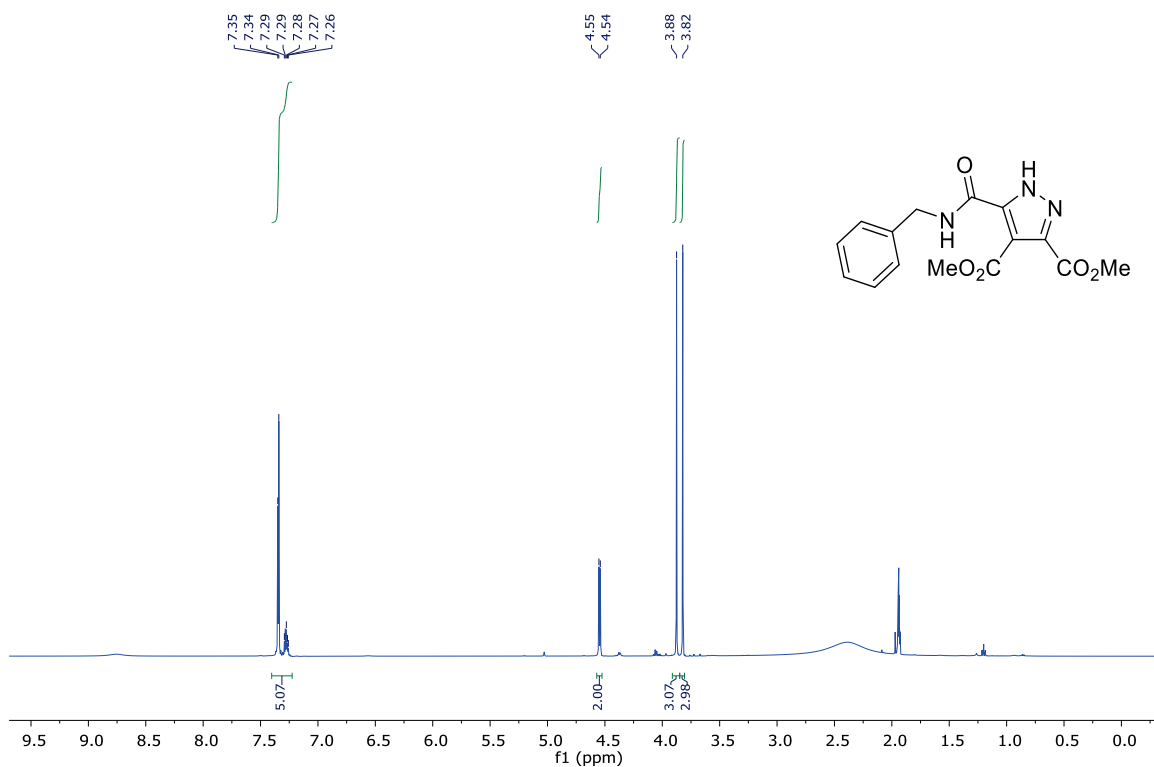

**Figure S6.** <sup>1</sup>H NMR spectrum of dimethyl 5-(benzylcarbamoyl)-1H-pyrazole-3,4-dicarboxylate (**3a**) in CD<sub>3</sub>CN (500 MHz).

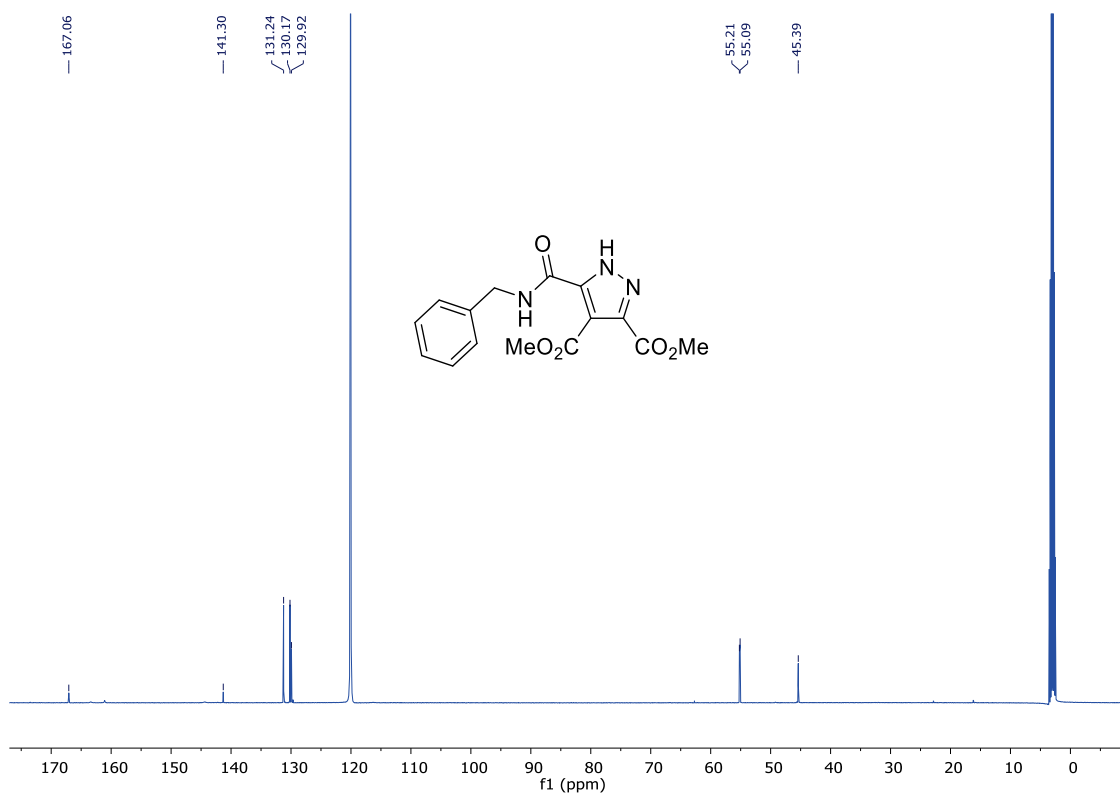

**Figure S7.** <sup>13</sup>C NMR spectrum of dimethyl 5-(benzylcarbamoyl)-1H-pyrazole-3,4-dicarboxylate (**3a**) in CD<sub>3</sub>CN (126 MHz).

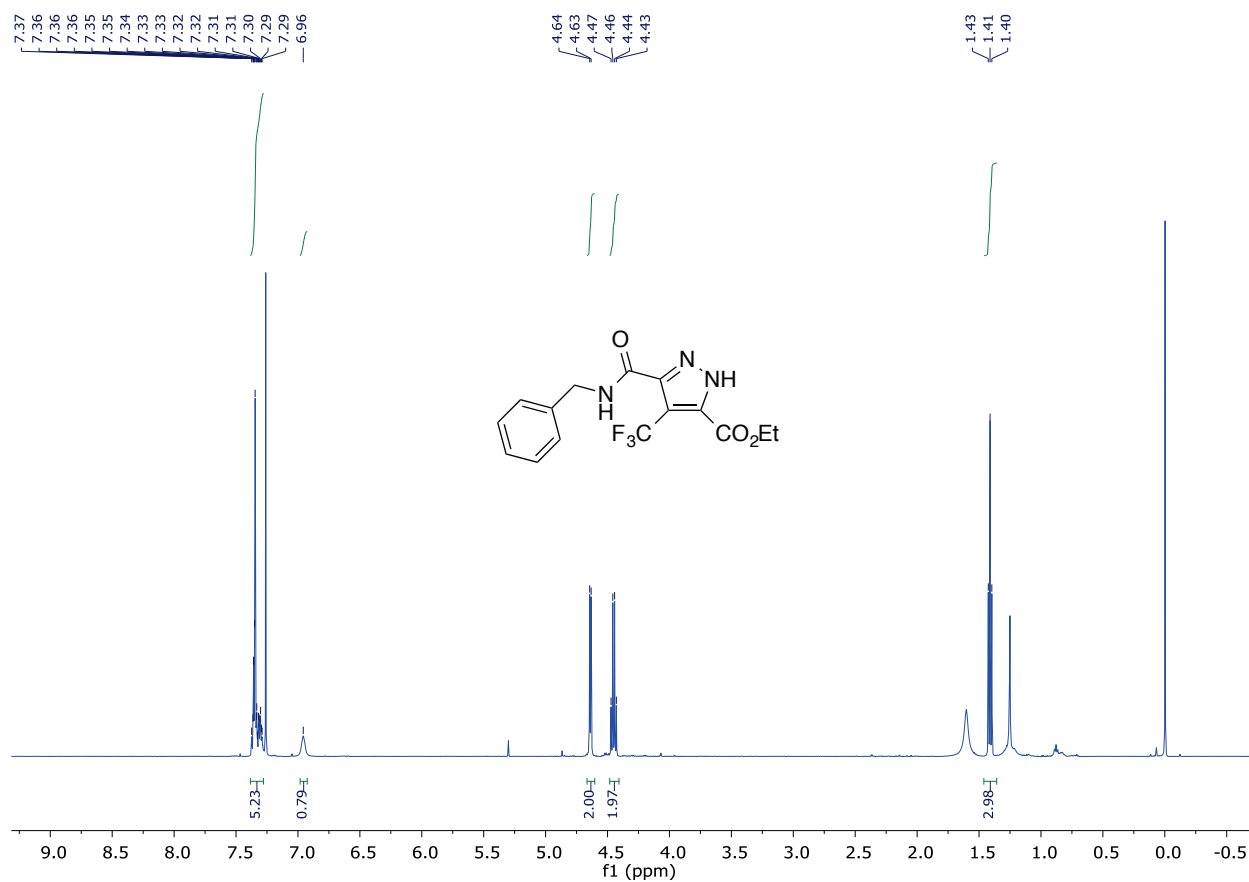

**Figure S8.** <sup>1</sup>H NMR spectrum of ethyl 3-(benzylcarbamoyl)-4-(trifluoromethyl)-1H-pyrazole-5-carboxylate (**5a**) in CD<sub>3</sub>Cl<sub>3</sub> (500 MHz).

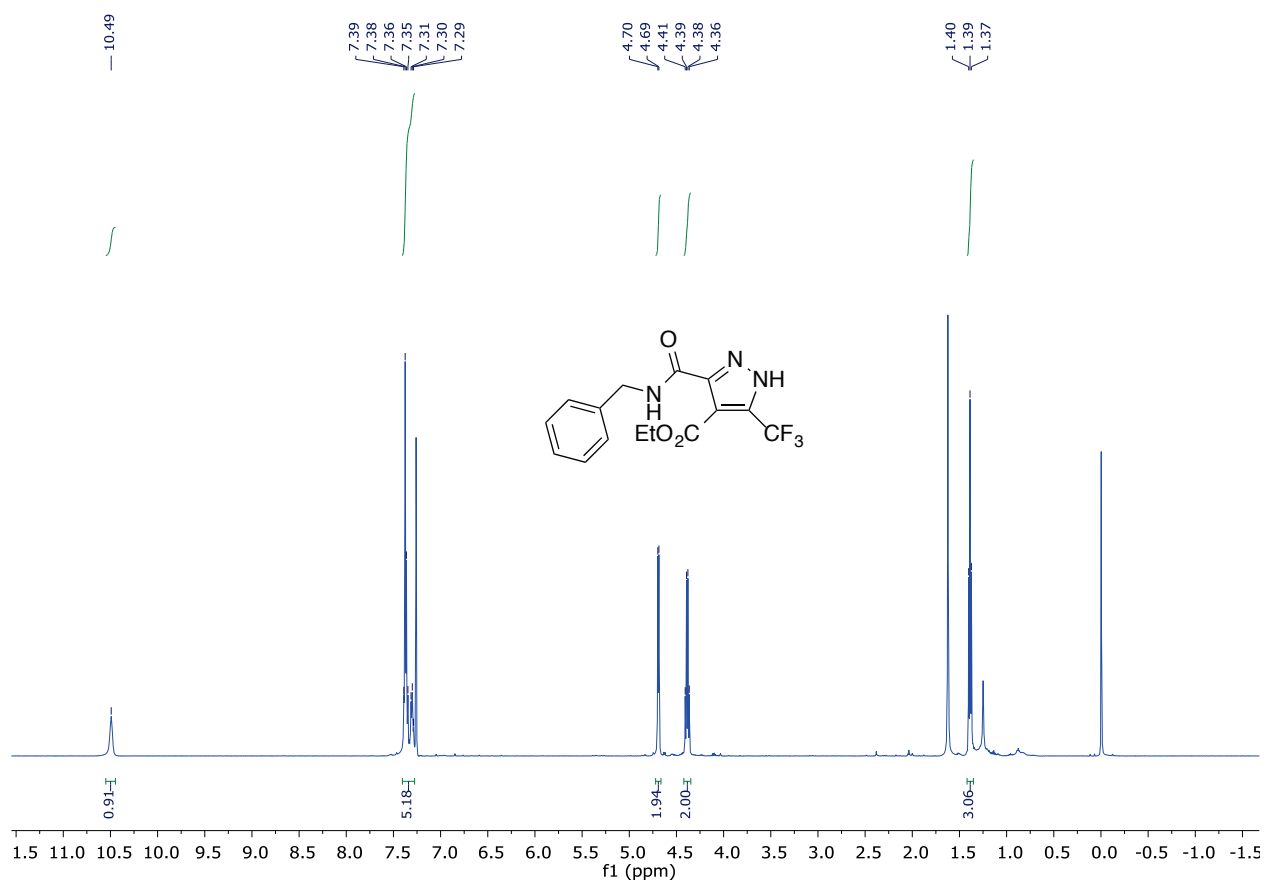

**Figure S9.**  $^1\text{H}$  NMR spectrum of ethyl 5-(benzylcarbamoyl)-3-(trifluoromethyl)-1H-pyrazole-4-carboxylate (**5a'**) in  $\text{CD}_3\text{Cl}_3$  (500 MHz).

### Cartesian coordinates, total energies, and imaginary frequencies (for TSs)

All energies include IEFPCM single point corrections. TS frequencies are from gas phase optimized structures.

Chemical structure of **(1, GS)** is shown above the table.

|   |             |             |             |
|---|-------------|-------------|-------------|
| C | 0.30852100  | 0.03905300  | -0.02920200 |
| N | -2.02771400 | -0.22212300 | 0.01247700  |
| N | -2.99960900 | 0.33676500  | 0.04001300  |
| O | 0.22780700  | 1.25507100  | -0.03578400 |
| N | 1.50346700  | -0.61999200 | -0.05770900 |
| H | 1.51615300  | -1.60579700 | 0.14568500  |
| C | 2.73859300  | 0.13170600  | 0.05051200  |
| H | 2.86639000  | 0.56630800  | 1.04724000  |
| H | 3.57565100  | -0.53248600 | -0.16735100 |
| H | 2.72785900  | 0.94470800  | -0.67669500 |
| C | -0.87166200 | -0.83196100 | -0.01577300 |
| H | -0.89422800 | -1.90863500 | -0.05928700 |

HF: -356.6533518  
 Sum of electronic and zero-point Energies: -356.564190  
 Sum of electronic and thermal Energies: -356.556466  
 Sum of electronic and thermal Enthalpies: -356.555522  
 Sum of electronic and thermal Free Energies: -356.596282

Chemical structure of **(1', GS)** is shown above the table.

|   |             |             |             |
|---|-------------|-------------|-------------|
| C | -0.03072100 | -0.32329300 | 0.03512000  |
| N | 2.22317000  | 0.30315400  | -0.01530900 |

|   |             |             |             |
|---|-------------|-------------|-------------|
| N | 3.26729000  | -0.10269300 | -0.02234200 |
| O | 0.29530300  | -1.50174200 | 0.02846700  |
| N | -1.33254300 | 0.09319500  | 0.08320400  |
| C | -2.38529900 | -0.89470700 | -0.05843200 |
| H | -3.14021900 | -0.74963200 | 0.72027700  |
| H | -2.87020400 | -0.81139600 | -1.03890400 |
| H | -1.94604400 | -1.88527900 | 0.04085200  |
| C | 0.98648700  | 0.73650800  | -0.00226900 |
| H | 0.86382200  | 1.80277200  | -0.07240800 |
| C | -1.71523600 | 1.48750900  | -0.00159100 |
| H | -1.13517700 | 2.09856400  | 0.69400400  |
| H | -1.60739900 | 1.89301800  | -1.01621300 |
| H | -2.76401000 | 1.57420400  | 0.28881700  |

HF: -395.9396332  
 Sum of electronic and zero-point Energies: -395.822047  
 Sum of electronic and thermal Energies: -395.813019  
 Sum of electronic and thermal Enthalpies: -395.812075  
 Sum of electronic and thermal Free Energies: -395.856254

Chemical structure of **MeN<sub>3</sub> (2, GS)** is shown above the table.

|   |             |             |             |
|---|-------------|-------------|-------------|
| C | 1.51977100  | 0.29700200  | 0.00000000  |
| N | -0.71122300 | -0.11313200 | -0.00000400 |
| N | -1.76425600 | 0.28699900  | 0.00000100  |
| N | 0.39482300  | -0.65083800 | 0.00000100  |
| H | 2.42800900  | -0.30193400 | 0.00056600  |
| H | 1.50928500  | 0.92898100  | -0.89387800 |
| H | 1.50866600  | 0.92973700  | 0.89333200  |

HF: -204.0205204  
 Sum of electronic and zero-point Energies: -203.969418  
 Sum of electronic and thermal Energies: -203.965081  
 Sum of electronic and thermal Enthalpies: -203.964136  
 Sum of electronic and thermal Free Energies: -203.995767

Chemical structure of **F<sub>3</sub>C-C≡CO<sub>2</sub>Me (3a, GS)** is shown above the table.

|   |             |             |             |
|---|-------------|-------------|-------------|
| C | 0.74787000  | 0.06985700  | -0.00078600 |
| C | -0.44533400 | 0.18237300  | 0.00047100  |
| C | 2.21160900  | -0.06760900 | -0.00061900 |
| C | -1.89391600 | 0.38676100  | 0.00008000  |
| O | -2.40531600 | 1.46988700  | -0.00086600 |
| O | -2.53855600 | -0.77507700 | 0.00053900  |



Sum of electronic and zero-point Energies: -998.534143  
Sum of electronic and thermal Energies: -998.516355  
Sum of electronic and thermal Enthalpies: -998.515411  
Sum of electronic and thermal Free Energies: -998.583293  
Frequencies: -398.4322

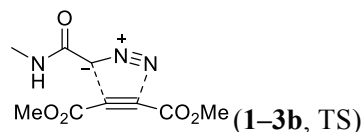

|   |             |             |             |
|---|-------------|-------------|-------------|
| C | 1.33164400  | 0.14431800  | -0.24251400 |
| C | 0.15119200  | 0.49921800  | -0.36690300 |
| C | -2.00039200 | -1.48947200 | 0.05255800  |
| N | -0.06590900 | -1.87516700 | -1.24509500 |
| N | 1.02027800  | -2.13781800 | -1.12506100 |
| O | -1.70232700 | -2.42797300 | 0.76460200  |
| C | 2.75898600  | 0.02022700  | -0.10390900 |
| O | 3.54547500  | 0.25370200  | -0.98691500 |
| C | 3.09905500  | -0.39949600 | 1.12194600  |
| C | 4.50351500  | -0.56602000 | 1.32335100  |
| H | 5.02004900  | 0.38691500  | 1.19256500  |
| H | 4.61026000  | -0.92544100 | 2.34500800  |
| H | 4.90415600  | -1.29218300 | 0.61368500  |
| N | -3.13735600 | -0.77159300 | 0.17308500  |
| H | -3.18483800 | 0.11423200  | -0.31126600 |
| C | -4.03304500 | -1.03614800 | 1.28293200  |
| C | -3.57504900 | -0.77234500 | 2.24153100  |
| H | -4.94524100 | -0.45635000 | 1.14189000  |
| H | -4.28094400 | -2.09848300 | 1.30498500  |
| C | -1.08786700 | -1.02492200 | -1.05630000 |
| H | -1.50540800 | -0.62462700 | -1.97412000 |
| O | -0.76495900 | 1.64654600  | -0.33813100 |
| C | -0.20709100 | 2.69673600  | 0.25233800  |
| O | -1.88137700 | 1.66065000  | -0.80616700 |
| C | -1.02009300 | 3.87287300  | 0.30065000  |
| H | -0.41461200 | 4.62267300  | 0.80458700  |
| H | -1.27454500 | 4.19489900  | -0.71127500 |
| H | -1.93668900 | 3.67408900  | 0.85859700  |

HF: -889.56044

Sum of electronic and zero-point Energies: -889.353176  
Sum of electronic and thermal Energies: -889.334510  
Sum of electronic and thermal Enthalpies: -889.333566  
Sum of electronic and thermal Free Energies: -889.402783  
Frequencies: -373.0388

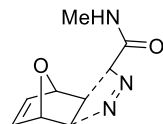

|   |             |             |             |
|---|-------------|-------------|-------------|
| C | -3.42035900 | -0.68079600 | 0.56408600  |
| C | -2.60417000 | 0.54585300  | 0.11280700  |
| C | -1.47466300 | -1.13071300 | -0.53281300 |
| C | -2.70995600 | -1.73124100 | 0.16370200  |
| H | -4.33002400 | -0.65262400 | 1.14675600  |
| H | -2.89872500 | -2.78369500 | 0.33087300  |
| C | -1.33284600 | 0.59287000  | 0.98561300  |
| C | -0.58621700 | -0.47703200 | 0.55301000  |
| C | -3.13786500 | 1.47955500  | -0.05126700 |
| H | -0.98384700 | -1.74350800 | -1.28771100 |
| O | -2.04599500 | 0.04550500  | -1.10981000 |
| H | 0.13483300  | -1.02638600 | 1.14408500  |
| H | -1.27946600 | 1.07017500  | 1.95275700  |
| N | -0.34492000 | 2.31252900  | -0.04966100 |
| N | 0.43816100  | 1.70282300  | -0.60923000 |
| C | 0.95678800  | 0.48384000  | -0.78714000 |
| C | 0.79583500  | 0.07497200  | -1.77918900 |
| C | 2.21123300  | 0.23434900  | -0.03210500 |
| N | 2.54559800  | 0.90811100  | 0.92320600  |
| O | 2.88629400  | -0.88213600 | -0.42471900 |
| C | 2.66538500  | -1.29664200 | -1.31509100 |
| H | 4.11155400  | -1.26679000 | 0.24785600  |
| H | 4.34457700  | -2.30298500 | 0.00003200  |
| H | 4.95116100  | -0.62542900 | -0.03841400 |
| H | 3.96638800  | -1.17691500 | 1.32518000  |

HF: -663.9045655

Sum of electronic and zero-point Energies: -663.708351  
Sum of electronic and thermal Energies: -663.695749  
Sum of electronic and thermal Enthalpies: -663.694805  
Sum of electronic and thermal Free Energies: -663.748513  
Frequencies: -496.1267

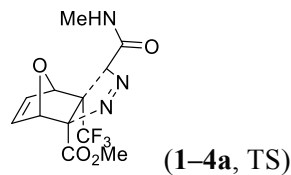

|   |            |             |             |
|---|------------|-------------|-------------|
| C | 3.00925000 | -1.63157000 | -0.23373700 |
| C | 2.33801200 | -0.97213100 | 0.97696800  |
| C | 0.81195300 | -2.13119000 | 0.07540300  |

|   |             |             |             |
|---|-------------|-------------|-------------|
| C | 2.04930300  | -2.35263200 | -0.80735700 |
| H | 4.02189100  | -1.44517900 | -0.55955800 |
| C | 2.06644900  | -2.91960500 | -1.72643800 |
| C | 1.36500200  | 0.08158300  | 0.40897700  |
| C | 0.33423200  | -0.65881600 | -0.14112200 |
| H | 2.96369400  | -0.65507100 | 1.80679700  |
| H | 0.03985900  | -2.89816300 | 0.06404000  |
| O | 1.40194300  | -1.98640800 | 1.35998800  |
| N | 0.44661700  | 0.66131600  | 2.39553800  |
| N | -0.53054300 | 0.11928500  | 2.21674100  |
| C | -1.29437200 | -0.58820300 | 1.37006600  |
| H | -1.36477000 | -1.63652200 | 1.64841900  |
| C | -2.53154600 | 0.15147200  | 0.94274300  |
| O | -2.71338500 | 1.31668800  | 1.22317400  |
| N | -3.39912000 | -0.59745200 | 0.21534000  |
| H | -3.05568100 | -1.45980200 | -0.17928900 |
| C | -4.49308200 | 0.07032400  | -0.46832000 |
| H | -5.13511200 | -0.68319400 | -0.92437200 |
| H | -5.07089100 | 0.64503700  | 0.25625500  |
| C | -4.12135300 | 0.75546900  | -1.23714200 |
| H | 1.87532100  | 1.40794500  | 0.05771000  |
| O | 3.03860200  | 1.71325700  | 0.17509200  |
| O | 0.92507200  | 2.23392500  | -0.39053000 |
| C | 1.37384000  | 3.54032400  | -0.75122500 |
| C | 2.11450900  | 3.47724200  | -1.55094500 |
| H | 0.48579200  | 4.07240700  | -1.08663600 |
| H | 1.81938400  | 4.03711400  | 0.11286300  |
| C | -0.41658400 | -0.35818000 | -1.39840200 |
| F | -1.18069700 | 0.72943300  | -1.36072500 |
| F | -1.23956100 | -1.40035500 | -1.69442800 |
| F | 0.40600600  | -0.23408000 | -2.45033000 |

HF: -1228.6961454

Sum of electronic and zero-point Energies= -1228.451213  
Sum of electronic and thermal Energies= -1228.430620  
Sum of electronic and thermal Enthalpies= -1228.429675  
Sum of electronic and thermal Free Energies= -1228.501826  
Frequencies: -393.8664

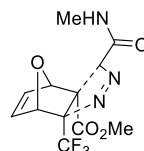

|   |             |             |             |
|---|-------------|-------------|-------------|
| C | -3.05995500 | -1.33059700 | 0.81957900  |
| C | -2.51452300 | -0.89809400 | -0.55133300 |
| C | -0.97094200 | -2.06960400 | 0.30717900  |
| C | -2.08869600 | -2.06361300 | 1.35766100  |
| H | -4.00144400 | -1.01404400 | 1.24445500  |
| H | -2.01939600 | -2.50828400 | 2.33937100  |
| C | -1.38043500 | 0.12322600  | -0.28034700 |
| C | -0.37207000 | -0.63957500 | 0.27623700  |
| H | -3.22304400 | -0.63705200 | -1.33332000 |
| H | -0.26337200 | -2.89535600 | 0.32967400  |
| O | -1.72359000 | -2.03373100 | -0.90382600 |
| N | -0.70784200 | 0.34903000  | -2.36232700 |
| N | 0.27205300  | -0.21278000 | -2.25325300 |
| C | 1.09258200  | -0.88014300 | -1.43661100 |
| C | 1.04579100  | -1.95793300 | -1.56198500 |
| H | 2.40482500  | -0.20632900 | -1.17247600 |
| O | 2.72593800  | 0.83452400  | -1.70679600 |
| N | 3.17857300  | -0.86053700 | -0.27051700 |
| C | 2.76878900  | -1.59125000 | 0.29290600  |
| C | 4.44298400  | -0.27907200 | 0.14259100  |
| H | 4.76897800  | -0.76487400 | 1.06265400  |
| H | 5.20425600  | -0.42164500 | -0.62863500 |
| H | 4.32725000  | 0.79477400  | 0.31018100  |
| C | -1.69022500 | 1.56071100  | -0.03893800 |
| O | 0.62083200  | -0.27210000 | 1.29672800  |
| C | 1.08966500  | -1.08841400 | 2.06587700  |
| O | 0.96920800  | 1.00519700  | 1.26343600  |
| C | 1.91950000  | 1.41468000  | 2.24703300  |
| H | 2.80735000  | 0.78099800  | 2.20253800  |
| H | 2.16460400  | 2.44668000  | 2.00490300  |
| H | 1.47822200  | 1.34367400  | 3.24335200  |
| F | -1.90864800 | 1.82424300  | 1.26450900  |
| F | -2.82082400 | 1.89912300  | -0.68595700 |
| F | -0.73391700 | 2.39429200  | -0.45152600 |

HF: -1228.6970692

Sum of electronic and zero-point Energies= -1228.451648  
Sum of electronic and thermal Energies= -1228.431289  
Sum of electronic and thermal Enthalpies= -1228.430345  
Sum of electronic and thermal Free Energies= -1228.501143  
Frequencies: -388.9384

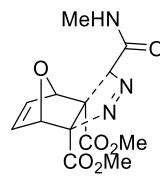

|   |             |             |             |
|---|-------------|-------------|-------------|
| C | -3.09829100 | -1.46845100 | 0.76302200  |
| C | -2.59539900 | -0.91459200 | -0.57682500 |
| C | -1.03807600 | -2.17067900 | 0.10906700  |
| C | -2.11838500 | -2.25895400 | 1.19460500  |





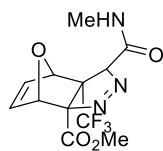

(1-4a, cycloadduct)

|   |             |             |             |
|---|-------------|-------------|-------------|
| C | -2.94031200 | -1.28523200 | 0.00356600  |
| C | -2.10234700 | -1.03460700 | -1.23874400 |
| C | -0.82718900 | -2.10623600 | 0.09035500  |
| C | -2.14139200 | -1.95254600 | 0.83298700  |
| H | -3.93069300 | -0.89247500 | 0.17226100  |
| H | -2.31737800 | -2.24898800 | 1.85687000  |
| C | -1.05520200 | 0.07704800  | -0.87878400 |
| C | -0.08432500 | -0.71543600 | 0.05179700  |
| H | -2.60271700 | -0.87928800 | -2.19117900 |
| H | -0.17710600 | -2.93830700 | 0.35343300  |
| O | -1.24936200 | -2.17483300 | -1.26667200 |
| N | -0.26309100 | 0.42566400  | -2.08184500 |
| N | 0.87567200  | -0.02960000 | -2.05745900 |
| C | 1.16625800  | -0.82978100 | -0.85324000 |
| H | 1.25105200  | -1.85967300 | -1.21643200 |
| C | 2.53413200  | -0.52646300 | -0.24260800 |
| N | 2.93253300  | -1.19212000 | 0.69229200  |
| O | 3.23632700  | 0.46903100  | -0.81339300 |
| H | 2.87246200  | 0.90351400  | -1.64726800 |
| C | 4.56223800  | 0.79656100  | -0.32668000 |
| H | 4.91112600  | 1.69523800  | -0.83502300 |
| H | 4.52479400  | 0.97861500  | 0.74939600  |
| H | 5.26339400  | -0.02214100 | -0.51159600 |
| O | -1.70281600 | 1.36528500  | -0.39297700 |
| C | -2.88556600 | 1.52444200  | -0.26959800 |
| O | -0.78208600 | 2.29445100  | -0.16337000 |
| C | -1.27752500 | 3.53355400  | 0.35244300  |
| H | -1.77257800 | 3.36112800  | 1.31030800  |
| H | -0.40374700 | 4.16934900  | 0.47780000  |
| C | -1.98486700 | 3.97561700  | -0.35087300 |
| H | 0.14998500  | -0.14343900 | 1.44505500  |
| F | 1.06922000  | 0.82385300  | 1.47115800  |
| F | 0.52969600  | -1.10185900 | 2.29406100  |
| F | -0.97550300 | 0.39067200  | 1.95711000  |

HF: -1228.7795947  
 Sum of electronic and zero-point Energies= -1228.529621  
 Sum of electronic and thermal Energies= -1228.510293  
 Sum of electronic and thermal Enthalpies= -1228.509348  
 Sum of electronic and thermal Free Energies= -1228.57289

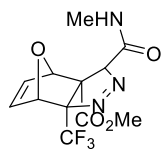(1-4a, cycloadduct-anti CF<sub>3</sub>)

|   |             |             |             |
|---|-------------|-------------|-------------|
| C | -3.02746900 | -0.56109500 | 0.90611800  |
| C | -2.29028000 | -1.31084500 | -0.19062000 |
| C | -1.00078700 | -1.38900200 | 1.50330200  |
| C | -2.21727200 | -0.60568400 | 1.96148300  |
| H | -3.95770500 | -0.02643400 | 0.77995400  |
| C | -2.31608200 | -0.12279500 | 2.92148000  |
| H | -1.10964000 | -0.37869400 | -0.66822800 |
| H | -0.14543800 | -0.49053600 | 0.54955900  |
| C | -2.85448100 | -1.75447200 | -1.00701800 |
| H | -0.41776100 | -1.91704500 | 2.25488800  |
| O | -1.55828400 | -2.28247800 | 0.53889700  |
| N | -0.42007300 | -1.01064300 | -1.81234400 |
| N | 0.66460900  | -1.49290400 | -1.50424500 |
| C | 0.99985500  | -1.31734300 | -0.07808300 |
| C | 1.00102300  | -2.32761600 | 0.34730500  |
| H | 2.41480100  | -0.78545800 | 0.14143700  |
| O | 2.77127800  | -0.46619400 | 1.26075200  |
| N | 3.21093800  | -0.74527100 | -0.93994100 |
| C | 2.83613300  | -1.03795300 | -1.82938500 |
| C | 4.58485900  | -0.29766100 | -0.82120300 |
| H | 5.07449300  | -0.40656700 | -1.78843700 |
| H | 4.62318200  | 0.75009000  | -0.51110100 |
| C | 5.11501600  | -0.89393200 | -0.07491500 |
| H | -1.59923500 | 0.98389200  | -1.15441400 |
| O | 0.31517300  | 0.79508100  | 1.20128300  |
| C | 0.10473600  | 1.08214000  | 2.34619300  |
| O | 0.97689600  | 1.55722100  | 0.33089100  |
| C | 1.58433300  | 2.72506800  | 0.88867200  |
| H | 2.06353000  | 3.23472000  | 0.05510600  |
| H | 0.82468900  | 3.36080600  | 1.34685100  |
| H | 2.31850000  | 2.42347800  | 1.63934900  |
| F | -1.86780600 | 1.82035600  | -0.14682900 |
| F | -2.73535000 | 0.83155200  | -1.85422300 |
| F | -0.72009300 | 1.58449100  | -1.95317900 |

HF: -1228.7852935  
 Sum of electronic and zero-point Energies= -1228.534858  
 Sum of electronic and thermal Energies= -1228.515728  
 Sum of electronic and thermal Enthalpies= -1228.514784  
 Sum of electronic and thermal Free Energies= -1228.582067

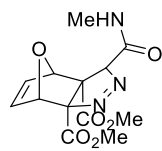

(1-4b, cycloadduct)

|   |             |             |             |
|---|-------------|-------------|-------------|
| C | -3.16858400 | -0.83321400 | 0.33513900  |
| C | -2.41049600 | -0.87000000 | -0.98058100 |
| C | -1.26794300 | -2.06456100 | 0.36313200  |
| C | -2.45914300 | -1.58871500 | 1.16986400  |
| H | -4.03657200 | -0.22617700 | 0.53993400  |
| H | -2.60060900 | -1.75614600 | 2.22626500  |
| C | -1.12290200 | 0.02327000  | -0.82761900 |
| C | -0.28825700 | -0.85810800 | 0.15983500  |
| H | -2.95084900 | -0.70075800 | -1.90952700 |
| H | -0.77743300 | -2.98871200 | 0.66228100  |
| O | -1.80873700 | -2.15798800 | -0.95435700 |
| N | -0.38981600 | 0.00776300  | -2.10916700 |
| N | 0.64357200  | -0.65067400 | -2.06679800 |
| C | 0.89981100  | -1.25492400 | -0.74337600 |
| H | 0.90284100  | -2.33892000 | -0.90383600 |
| C | 2.29217900  | -0.91563500 | -0.20928700 |
| O | 2.60912200  | -1.24492800 | 0.91913200  |
| N | 3.11674000  | -0.27996100 | -1.05940700 |
| H | 2.78494900  | -0.06626900 | -1.98748700 |
| C | 4.46990100  | 0.04688400  | -0.65638400 |
| H | 4.96761200  | 0.56089900  | -1.47816200 |
| H | 4.45772600  | 0.69523900  | 0.22354400  |
| H | 5.02610500  | -0.85919300 | -0.40323100 |
| C | -1.39251300 | 1.45927800  | -0.39994500 |
| O | -2.16288100 | 1.76253800  | 0.47039100  |
| O | -0.65800600 | 2.33202200  | -1.08246500 |
| C | -0.79133200 | 3.68896500  | -0.65804000 |
| H | -0.49577700 | 3.77903100  | 0.38980900  |
| H | -0.12856800 | 4.26470100  | -1.30075500 |
| C | -1.82496700 | 4.02156000  | -0.76948600 |
| H | 0.12264000  | -0.20322200 | 1.45779100  |
| O | -0.10679100 | -0.64604600 | 2.54692200  |
| O | 0.77390500  | 0.94370000  | 1.22633500  |
| C | 1.35244300  | 1.54741000  | 2.38560100  |
| H | 2.08141900  | 0.86076900  | 2.82179600  |
| H | 1.83724100  | 2.45724300  | 2.03487200  |
| H | 0.57568100  | 1.77789500  | 3.11697500  |

HF: -1119.6332184  
 Sum of electronic and zero-point Energies= -1119.344760  
 Sum of electronic and thermal Energies= -1119.324483  
 Sum of electronic and thermal Enthalpies= -1119.323538  
 Sum of electronic and thermal Free Energies= -1119.394488

## Oxanorbornadiene retro[4+2] Transition States

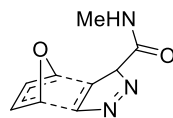(1-4(R<sub>1</sub> = R<sub>2</sub> = H), retro [4+2] TS)

|   |             |             |             |
|---|-------------|-------------|-------------|
| C | 3.40873300  | 0.102263900 | 0.66436000  |
| C | 2.74307200  | -0.83724300 | -0.14731700 |
| C | 1.90300600  | 1.06797700  | -0.66390800 |
| C | 0.80910800  | -0.72661100 | 1.01435900  |
| C | 0.36061300  | 0.49590400  | 0.47308900  |
| H | 2.93030400  | -1.88949000 | -0.30035100 |
| H | 1.47988800  | 1.76570900  | -1.37385600 |
| O | 2.11653400  | -0.19460600 | -1.15148600 |
| H | 0.17716200  | 1.38824900  | 1.05455200  |
| H | 1.21416200  | -0.91811100 | 1.99530000  |
| N | 0.19015300  | -1.81046800 | 0.34083300  |
| N | -0.57793000 | -1.41414700 | -0.56232900 |
| C | -0.67616800 | 0.05650100  | -0.53381200 |
| H | -0.52263700 | 0.42722800  | -1.55226800 |
| C | -2.07673700 | 0.53173500  | -0.12015000 |
| O | -2.27628700 | 1.70410700  | 0.13691200  |
| N | -3.03432500 | -0.41280100 | -0.08840700 |
| H | -2.77991700 | -1.35765200 | -0.33462800 |
| C | -4.39877700 | -0.06412300 | 0.25166900  |
| H | -5.00284100 | -0.97112900 | 0.25643700  |
| H | -4.43687500 | 0.40231600  | 1.23916900  |
| H | -4.81002900 | 0.64276600  | -0.47385500 |
| C | 2.89846000  | 1.33099500  | 0.31456400  |
| H | 3.07187500  | 2.28582200  | 0.78659400  |
| H | 4.08378100  | -0.13645000 | 1.47170000  |

HF: -663.9601643  
 Sum of electronic and zero-point Energies= -663.761155  
 Sum of electronic and thermal Energies= -663.749262  
 Sum of electronic and thermal Enthalpies= -663.748317  
 Sum of electronic and thermal Free Energies= -663.799971  
 Frequencies: -542.7028





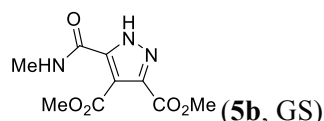

|   |             |             |             |
|---|-------------|-------------|-------------|
| C | -1.04783600 | -0.81498400 | 0.06801800  |
| C | 0.10845300  | 0.00891200  | 0.06208200  |
| N | -0.72474600 | -2.09959100 | 0.00327800  |
| N | 0.59912000  | -2.11068200 | -0.04299900 |
| C | 1.16627000  | -0.89362200 | -0.00654900 |
| C | 2.66379300  | -0.88889600 | -0.06475400 |
| O | 3.23521800  | -1.95858000 | -0.23049600 |
| N | 3.28478000  | 0.28500600  | 0.08224100  |
| H | 2.72589700  | 1.11222200  | 0.26940700  |
| C | 4.73261000  | 0.34307800  | 0.05838200  |
| H | 5.04008400  | 1.38376700  | 0.15549100  |
| H | 5.15715800  | -0.24124900 | 0.87946900  |
| H | 5.11410800  | -0.06381600 | -0.88107100 |
| C | -2.47136600 | -0.42444300 | 0.27492100  |
| O | -2.82345300 | 0.46104500  | 1.00651600  |
| O | -3.29924800 | -1.20248300 | -0.42129200 |
| C | -4.68741900 | -0.94680200 | -0.20432800 |
| H | -4.92914400 | 0.08281100  | -0.47501800 |
| H | -5.21843900 | -1.64985000 | -0.84287500 |
| H | -4.93986000 | -1.11040200 | 0.84535800  |
| C | 0.18584900  | 1.47803300  | 0.02949200  |
| O | 1.16064400  | 2.12714900  | 0.34794900  |
| O | -0.93294300 | 2.02700900  | -0.42038700 |

|   |             |             |             |
|---|-------------|-------------|-------------|
| C | -0.97227900 | 3.45522300  | -0.41132300 |
| H | -0.21895200 | 3.85663700  | -1.09175300 |
| H | -1.97429500 | 3.71930900  | -0.74237500 |
| H | -0.78809300 | 3.82805700  | 0.59754400  |
| H | 1.12727200  | -2.97273500 | -0.10578900 |

HF: -889.7227408  
 Sum of electronic and zero-point Energies: -889.507658  
 Sum of electronic and thermal Energies: -889.490629  
 Sum of electronic and thermal Enthalpies: -889.489685  
 Sum of electronic and thermal Free Energies: -889.553971

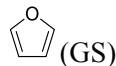

|   |             |             |             |
|---|-------------|-------------|-------------|
| C | -1.08801800 | -0.34857900 | 0.00016200  |
| C | -0.71771700 | 0.95597100  | -0.00013500 |
| C | 0.71745100  | 0.95615600  | 0.00005700  |
| C | 1.08811300  | -0.34829400 | 0.00013200  |
| O | 0.00016100  | -1.15148400 | -0.00020000 |
| H | -2.04157800 | -0.85003100 | 0.00024400  |
| H | -1.37564500 | 1.80973400  | -0.00024300 |
| H | 1.37513800  | 1.81009800  | 0.00010100  |
| H | 2.04182700  | -0.84945300 | 0.00020800  |

HF: -229.9487337  
 Sum of electronic and zero-point Energies: -229.878038  
 Sum of electronic and thermal Energies: -229.874368  
 Sum of electronic and thermal Enthalpies: -229.873424  
 Sum of electronic and thermal Free Energies: -229.904281

**References**

- (1) Myers, E. L.; Raines, R. T. *Angew. Chem., Int. Ed.* **2009**, *48*, 2359–2363.
- (2) van Berkel, S. S.; Dirks, A. J.; Debets, M. F.; van Delft, F. L.; Cornelissen, J. J. L. M.; Nolte, R. J. M.; Rutjes, F. P. J. T. *ChemBioChem* **2007**, *8*, 1504–1508.
- (3) Aronoff, M. R.; Gold, B.; Raines, R. T. *Tetrahedron Lett.* **2016**, *57*, 2347–2350.
- (4) Frisch, M. J.; Trucks, G. W.; Schlegel, H. B.; Scuseria, G. E.; Robb, M. A.; Cheeseman, J. R.; Scalmani, G.; Barone, V.; Mennucci, B.; Petersson, G. A.; Nakatsuji, H.; Caricato, M.; Li, X.; Hratchian, H. P.; Izmaylov, A. F.; Bloino, J.; Zheng, G.; Sonnenberg, J. L.; Hada, M.; Ehara, M.; Toyota, K.; Fukuda, R.; Hasegawa, J.; Ishida, M.; Nakajima, T.; Honda, Y.; Kitao, O.; Nakai, H.; Vreven, T.; Montgomery Jr., J. A.; Peralta, J. E.; Ogliaro, F.; Bearpark, M. J.; Heyd, J.; Brothers, E. N.; Kudin, K. N.; Staroverov, V. N.; Kobayashi, R.; Normand, J.; Raghavachari, K.; Rendell, A. P.; Burant, J. C.; Iyengar, S. S.; Tomasi, J.; Cossi, M.; Rega, N.; Millam, N. J.; Klene, M.; Knox, J. E.; Cross, J. B.; Bakken, V.; Adamo, C.; Jaramillo, J.; Gomperts, R.; Stratmann, R. E.; Yazyev, O.; Austin, A. J.; Cammi, R.; Pomelli, C.; Ochterski, J. W.; Martin, R. L.; Morokuma, K.; Zakrzewski, V. G.; Voth, G. A.; Salvador, P.; Dannenberg, J. J.; Dapprich, S.; Daniels, A. D.; Farkas, Ö.; Foresman, J. B.; Ortiz, J. V.; Cioslowski, J.; Fox, D. J. *Gaussian 09*; Gaussian, Inc.: Wallingford, CT, USA, 2009.
- (5) Zhao, Y.; Truhlar, D. *Theor. Chem. Acc.* **2008**, *120*, 215–241.
- (6) Lan, Y.; Zou, L.; Cao, Y.; Houk, K. N. *J. Phys. Chem. A* **2011**, *115*, 13906–13920.
- (7) (a) Miertuš, S.; Scrocco, E.; Tomasi, J. *Chem. Phys.* **1981**, *55*, 117–129. (b) Tomasi, J.; Mennucci, B.; Cancès, E. *J. Mol. Struct.* **1999**, *464*, 211–226. (c) Tomasi, J.; Mennucci, B.; Cammi, R. *Chem. Rev.* **2005**, *105*, 2999–3094.
